# Supplementary figures and images for: Identification of Aberrantly Expressed Genes during Aging in Rat Nucleus Pulposus Cells
Source: Hindawi journal article supplement (doi:10.1155/2019/2785207), 2019-07-10

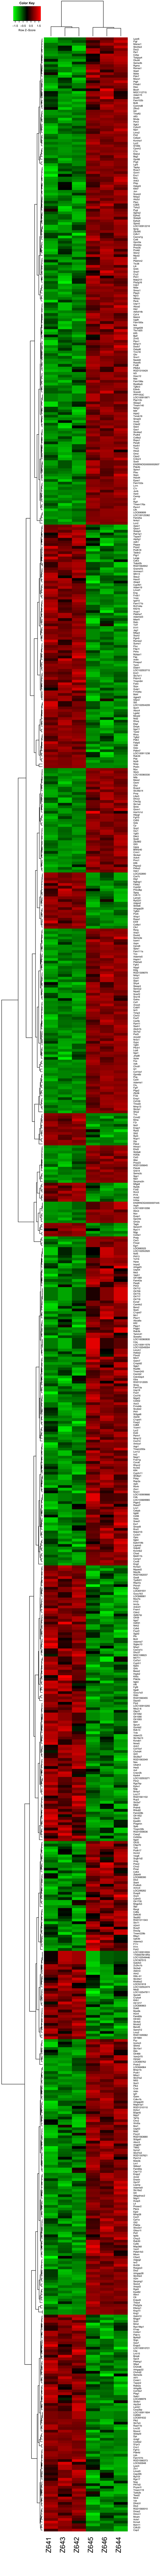

Supplement: f1 [file 2785207.f1.zip]
